# Supplementary material
Source: publisher figshare collection journal article supplement (https://acs.figshare.com/ndownloader/files/12581048)
Supplement: Supplementary file 1 [file 12581048]

## Supporting Information

### **Novel ALD Chemistry Enabled Low-Temperature Synthesis of Lithium Fluoride Coatings for Durable Lithium Anodes**

Lin Chen<sup>1,2</sup>, Kan-Sheng Chen<sup>3</sup>, Xinjie Chen<sup>3</sup>, Giovanni Ramirez<sup>1</sup>, Zhennan Huang<sup>4</sup>, Natalie R. Geise<sup>6,7</sup>, Hans-Georg Steinrück<sup>6</sup>, Brandon L. Fisher<sup>5</sup>, Reza Shahbazian-Yassar<sup>4</sup>, Michael F. Toney<sup>6</sup>, Mark C. Hersam<sup>3</sup>, and Jeffrey W. Elam<sup>\*1,2</sup>

<sup>1</sup> Energy System Division, Argonne National Laboratory, Lemont, Illinois 60439, USA

<sup>2</sup> Joint Center for Energy Storage Research, Argonne National Laboratory, Lemont, Illinois 60439, USA

<sup>3</sup> Department of Materials Science and Engineering, Northwestern University, Evanston, Illinois 60208, USA

<sup>4</sup> Department of Mechanical and Industrial Engineering, University of Illinois at Chicago, Chicago, Illinois 60607, USA

<sup>5</sup> Nanoscience & Technology Division, Argonne National Laboratory, Lemont, Illinois 60439, USA

<sup>6</sup> Stanford Synchrotron Radiation Lightsource, SLAC National Accelerator Center, Menlo Park, CA 94025, USA

<sup>7</sup> Department of Chemistry, Stanford University, Stanford, California 94305, USA

\*Corresponding Author: [jelam@anl.gov](mailto:jelam@anl.gov)

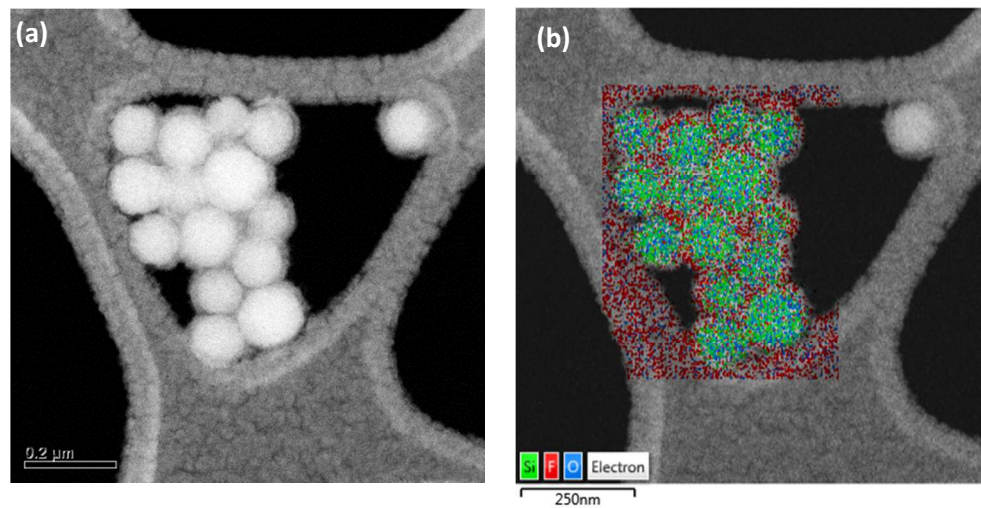

**Figure S1.** (a) High angle annular dark field (HAADF) transmission electron microscopy (TEM) image of 15 nm ALD LiF coating on 100 nm SiO<sub>2</sub> particles supported on a carbon TEM grid. (b) Energy-dispersive X-ray spectroscopy (EDX) map of Si, F, and O overlaid on the TEM image.

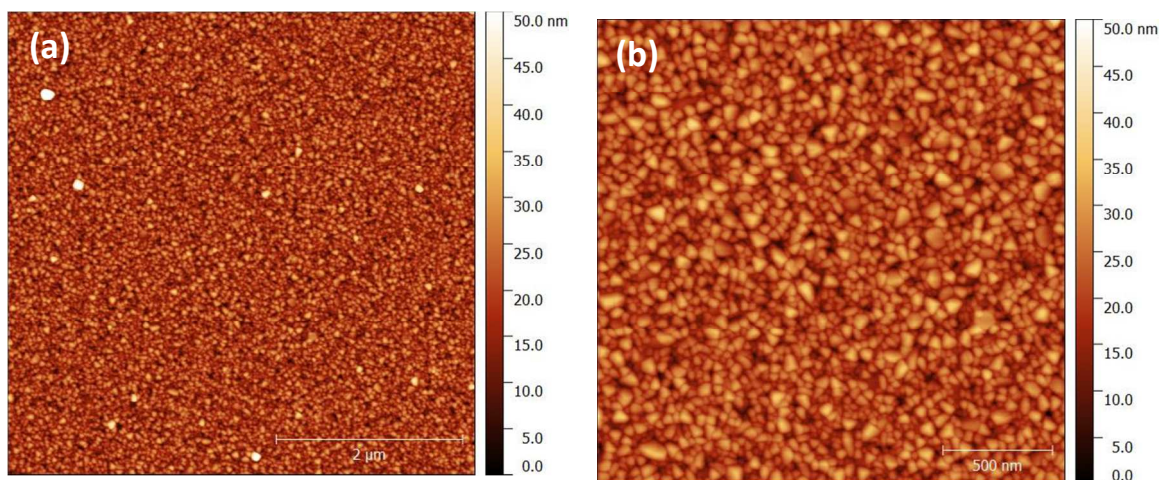

**Figure S2.** Atomic force microscopy (AFM) images of a 60 nm ALD LiF film on a silicon substrate using scan sizes of 5  $\mu\text{m}$  x 5  $\mu\text{m}$  (a) and 2  $\mu\text{m}$  x 2  $\mu\text{m}$  (b). These images have RMS roughness values of 6 and 7 nm, respectively.

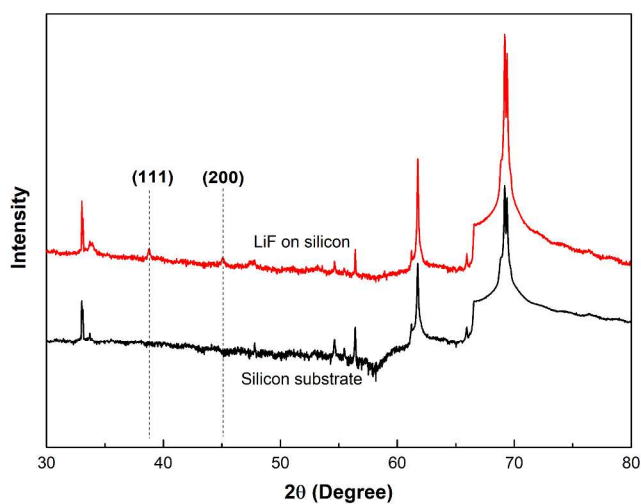

**Figure S3.** X-ray diffraction data for a 60 nm ALD LiF film on silicon (red) and uncoated silicon (black). The marked peaks correspond to the (111) and (200) reflections of cubic LiF. All other peaks are from the silicon substrate.

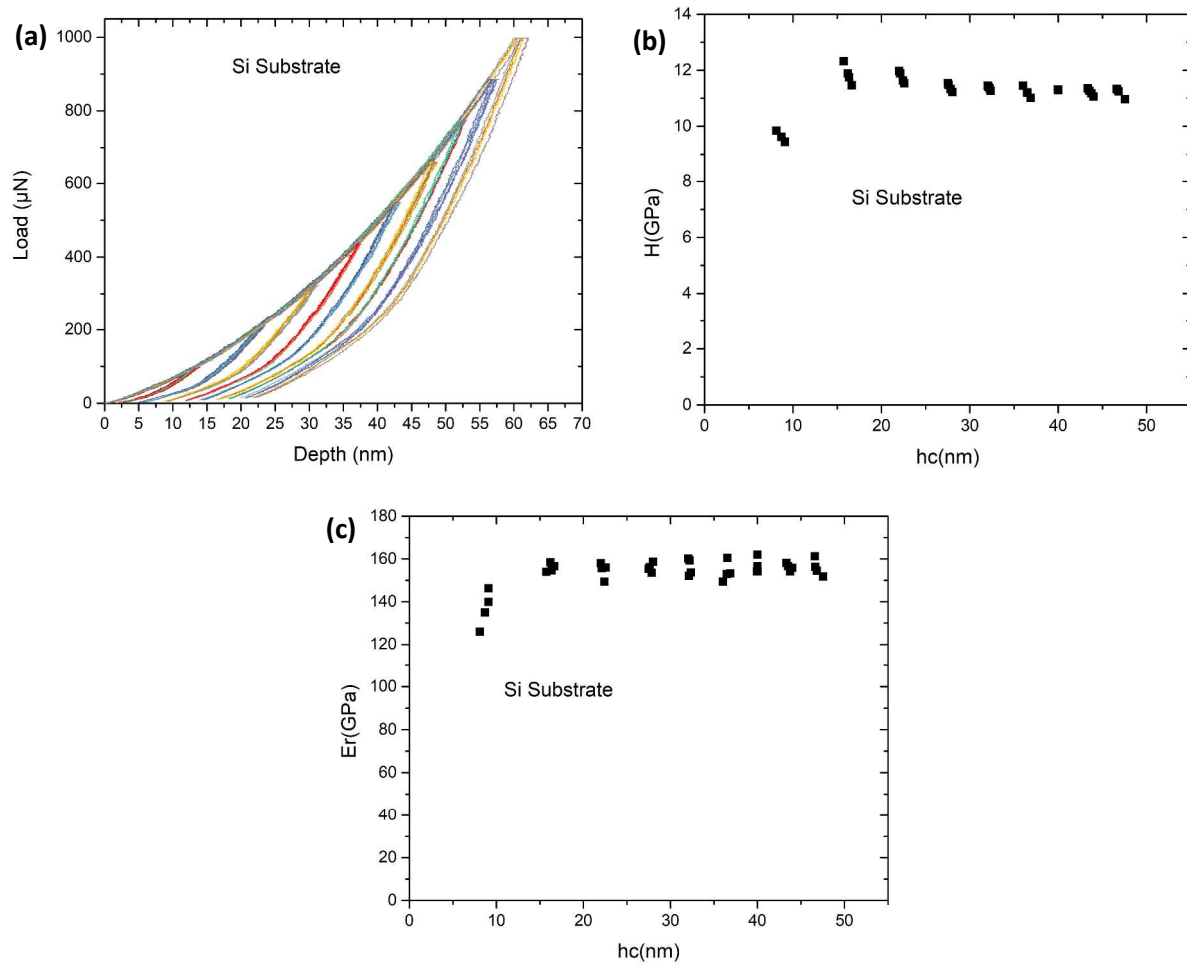

**Figure S4.** Nanoindentation testing of the Si(100) substrate. (a) Force-distance curves for the silicon substrate. (b) Hardness values for the silicon substrate. (c) Reduced modulus values for the silicon substrate.

**Calculation of Elastic Properties:** The force-distance curves (Fig. S4a and Fig. 3a) yield the reduced modulus values (Fig. S4c and Fig. 3b). The elastic modulus can then be calculated from:

$$1/E_r = (1 - \nu_i^2)/E_i + (1 - \nu_s^2)/E_s \quad (S1)$$

where  $E_r$  is the reduced modulus,  $E_i$  and  $\nu_i$  are the Young's modulus and Poisson's ratio for the nanoindenter tip (diamond), and  $E_s$  and  $\nu_s$  are the Young's modulus and Poisson's ratio for the substrate (silicon or LiF). Next, the shear modulus for the substrate ( $G_s$ ) is calculated using:

$$2G_s(1 + \nu_s) = E_s \quad (S2)$$

Table S1 shows the measured and calculated values, as well as the values for  $E_i$ ,  $\nu_i$ , and  $\nu_s$  taken from the literature.

**Table S1:** Mechanical properties of silicon and ALD LiF determined from nanoindentation measurements.

|             | LiF  | Silicon |
|-------------|------|---------|
| $E_r$ (GPa) | 140  | 155     |
| $E_i$ (GPa) | 1140 | 1140    |
| $\nu_i$     | 0.07 | 0.07    |
| $\nu_s$     | 0.27 | 0.17    |
| $E_s$ (GPa) | 148  | 174     |
| $G_s$ (GPa) | 58   | 74      |

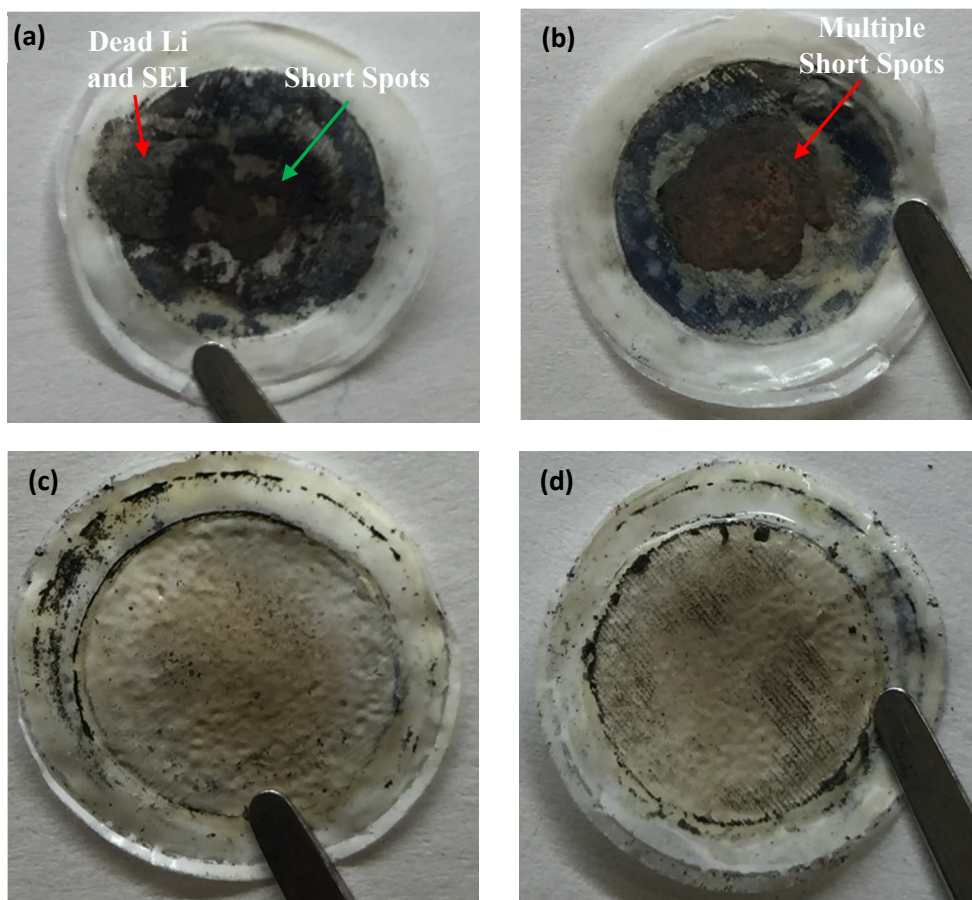

**Figure S5.** (a) One side of a separator used in Li symmetric cells with 5  $\mu\text{L}$  electrolyte after 100 hours (multiple failures occurred before disassembly). (b) The other side of separator shown in (a). (c) One side of a separator used in LiF-coated Li symmetric cells after 200 hours. (d) The other side of the separator shown in (c).

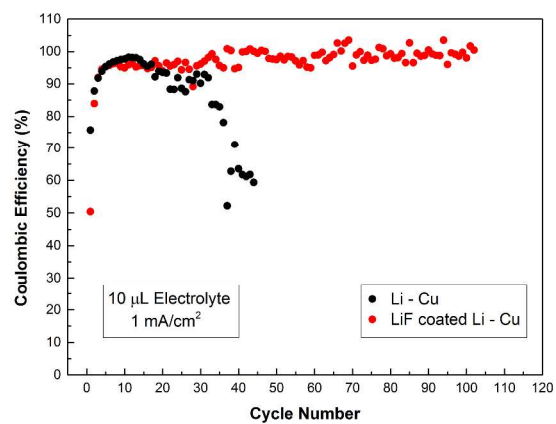

**Figure S6.** Lithium-copper cells with ether electrolyte of 10  $\mu\text{L}$  at a current density of 1  $\text{mA}/\text{cm}^2$ . 8 nm ALD LiF was only coated on the lithium metal.

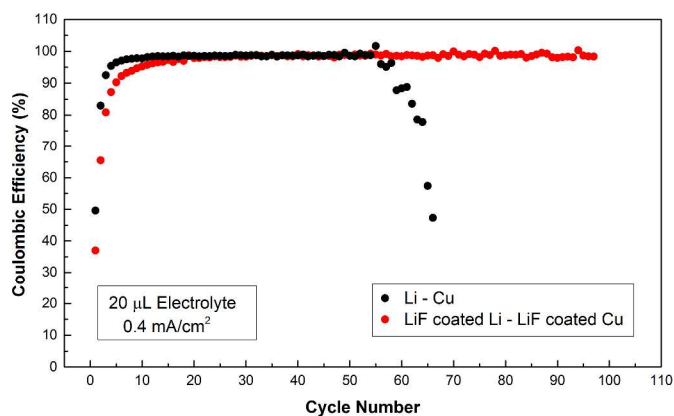

**Figure S7.** Lithium-copper cells with ether electrolyte of 20  $\mu\text{L}$  at a current density of 0.4  $\text{mA}/\text{cm}^2$ . 8 nm ALD LiF was coated on lithium metal and 6 nm ALD LiF was coated on Cu.

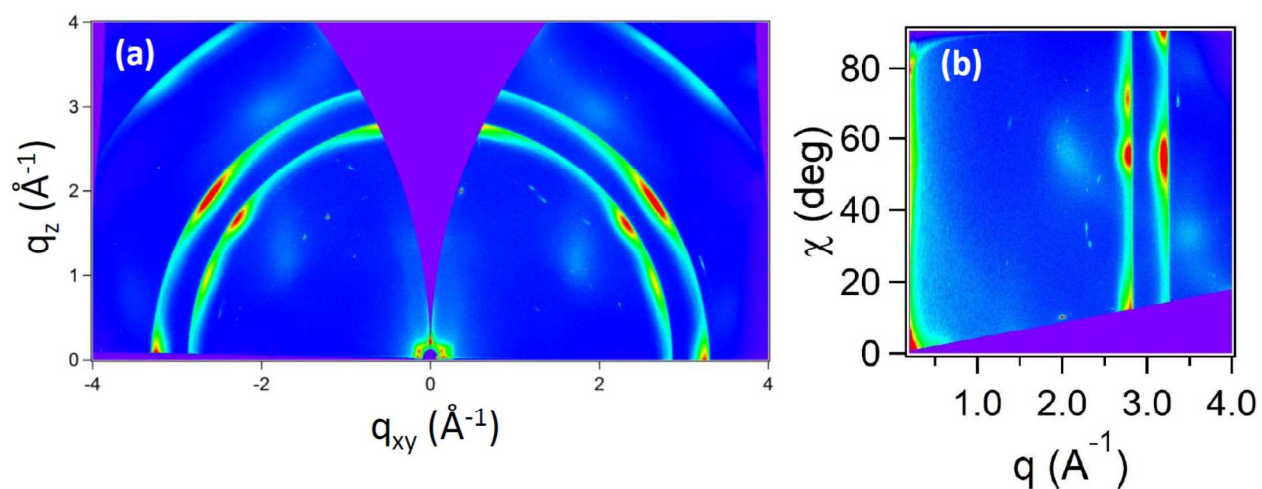

**Figure S8.** Grazing incidence wide angle X-ray scattering (GIWAXS) characterization for 118nm ALD LiF film on silicon. Stray sharp peaks are due to contamination from silicon dust resulting from cleaving Si substrate (a) 2D GIWAXS pattern of intensity as a function of  $q_{xy}$  (the in-plane component of the scattering vector) and  $q_z$  (the out-of-plane component). (b) Intensity vs azimuthal angle ( $\chi$ ) and total the scattering vector ( $q$ ) from the GIWAXS pattern in (a). The intensity changes along chi shows the (111) and (200) texturing of the ALD LiF. The (111) texture can be seen from the (111) peak near  $75^\circ$  and the (200) peak near  $54^\circ$ . The (200) texture is seen as the (111) peak near  $54^\circ$  and the (200) peak near  $90^\circ$ .
